# Supplementary material for: Core@shell, Au@TiOxnanoparticles by gas phase synthesis
Source: Royal Society of Chemistry journal article supplement (doi:10.1039/c7nr01148b), 2017-01-01
Supplement: c7nr01148b1.pdf [file c7nr01148b1.pdf]

## Supporting Information

*L. Martínez, A. Mayoral, M. Espiñeira, E. Roman, F. J. Palomares, and Y. Huttel.*

### **Table with all parameters of the MICS for the growth of pure Au and TiO<sub>x</sub> NPs and core@shell, Au@TiO<sub>x</sub> nanoparticles.**

Even though only two of the three magnetrons were turned on for the fabrication of the NPs, Ar was also introduced through the third magnetron, M3.

|                                                        | Au NPs   | TiO <sub>x</sub> NPs | Au@TiO <sub>x</sub> NPs |
|--------------------------------------------------------|----------|----------------------|-------------------------|
| Au power (W)                                           | 6        | -                    | 6                       |
| Au Voltage / Current (V / mA)                          | 250 / 23 | -                    | 250 / 23                |
| Ti power (W)                                           | -        | 11                   | 11                      |
| Ti Voltage / Current (V / mA)                          | -        | 164 / 67             | 164 / 67                |
| Au Ar flux (sccm)                                      | 20       | 20                   | 20                      |
| Ti Ar flux (sccm)                                      | 20       | 20                   | 20                      |
| M3 Ar flux (sccm)                                      | 30       | 30                   | 30                      |
| Au Distance to exit slit (mm)                          | 120      | 120                  | 120                     |
| Ti Distance to exit slit (mm)                          | 90       | 90                   | 90                      |
| M3 Distance to exit slit (mm)                          | 120      | 120                  | 120                     |
| Deposition time on Si wafer (min)                      | 4        | 4                    | 2                       |
| Coverage on Si wafer (NPs/μm <sup>2</sup> )            | 100      | 90                   | 20                      |
| Deposition rate on Si wafer (NPs/μm <sup>2</sup> .min) | 26       | 22                   | 11                      |
| Deposition time on TEM grid (s)                        | 80       | 80                   | 185                     |
| Coverage on TEM grid (NPs/μm <sup>2</sup> )            | 39       | 8                    | 29                      |
| Deposition rate on TEM grid (NPs/μm <sup>2</sup> .min) | 29       | 6                    | 9                       |

**Table 1:** Working parameter of the MICS.

During the depositions, both the water cooling of the magnetrons and the aggregation zone walls was fixed to 10 °C and regulated by a chiller.

### STEM images of pure Au nanoparticles recorded at different times.

Since the electron beam can induce structural changes, the current beam is adjusted in such a way that the nanoparticles are not altered during the acquisition time. This is demonstrated in the figure below where it can be observed that there is no change in NPs structure over acquisition time.

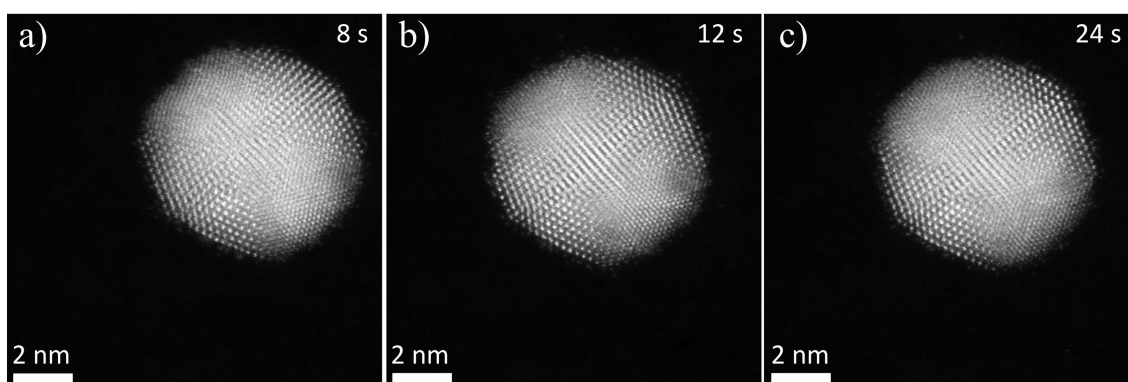

**Figure S1:** STEM images of Au nanoparticles recorded at (a) 8 s, (b) 12 s, and (c) 24 s.

### STEM images of pure Au nanoparticles recorded at different magnifications.

The figure below, illustrates the homogeneity of the deposits of Au NPs on TEM grids.

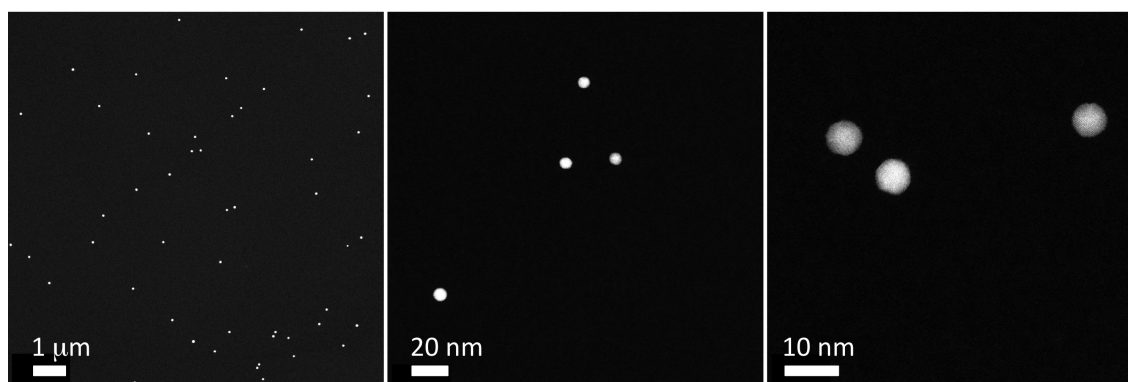

**Figure S2:** STEM images of Au nanoparticles recorded at different magnifications.

**EELS spectrum extracted from  $\text{TiO}_x$  nanoparticles.**

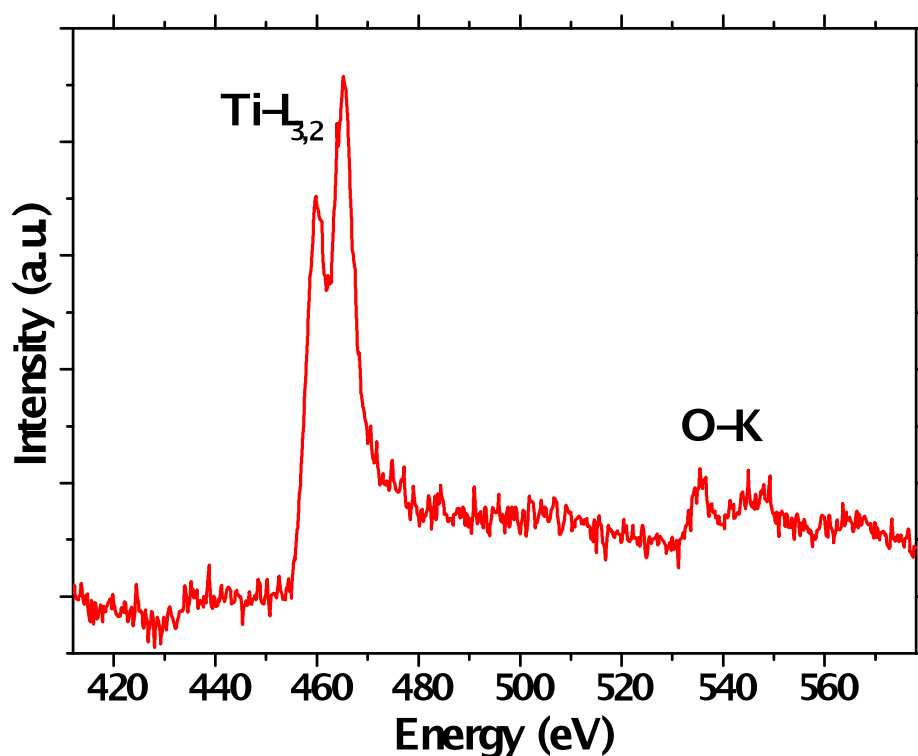

**Figure S3:** EELS spectrum extracted from the spectrum image presented in figure 4 of manuscript. Both edges  $\text{Ti-L}_{3,2}$  and  $\text{O-K}$  are clearly observed.

**STEM images of  $\text{Au@TiO}_x$  nanoparticles recorded at different magnifications.**

The figure below, illustrates the homogeneity of the deposits of  $\text{Au@TiO}_x$  NPs on TEM grids. At moderate magnification, the core@shell structure appears evident from the different contrasts. Also it clearly appears that all NPs have the  $\text{Au@TiO}_x$  structure.

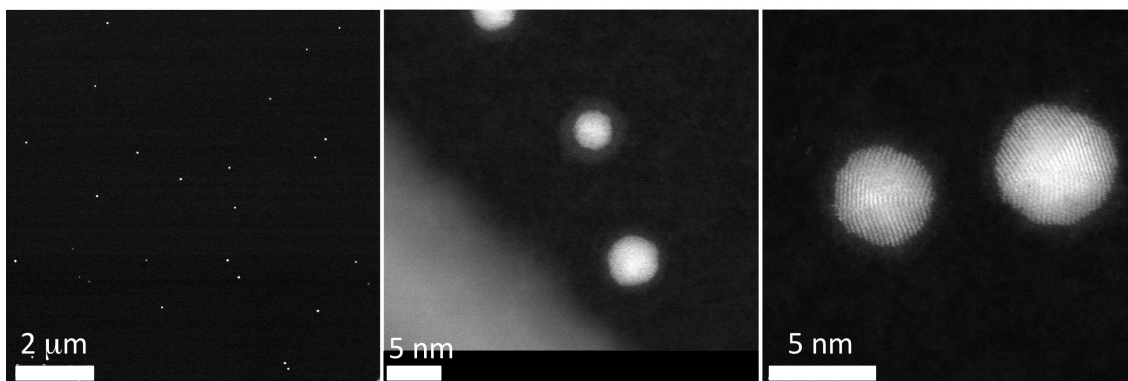

**Figure S4:** STEM images of  $\text{Au@TiO}_x$  nanoparticles recorded at different magnifications.

EDS and EELS spectra for Au@TiO<sub>x</sub> nanoparticles.

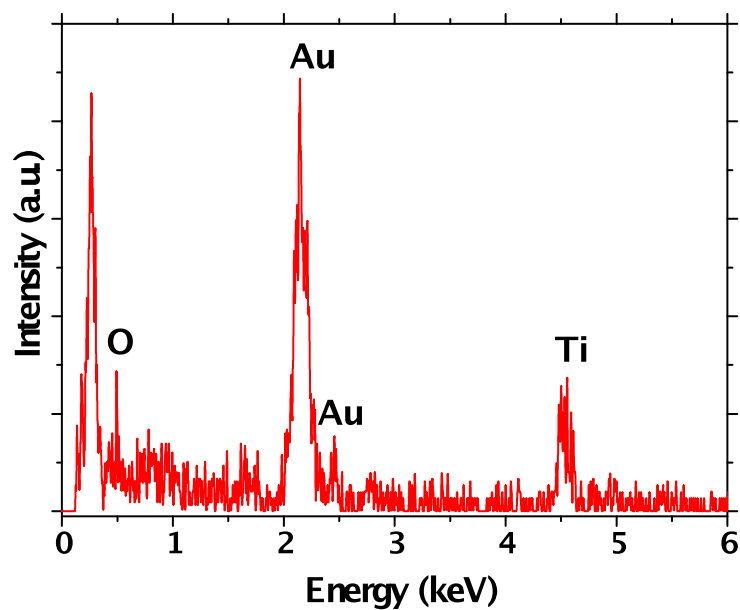

**Figure S5:** EDS profile of Au@TiO<sub>x</sub> NPs confirming the presence of Au core and Ti shell, which has been slightly oxidized.

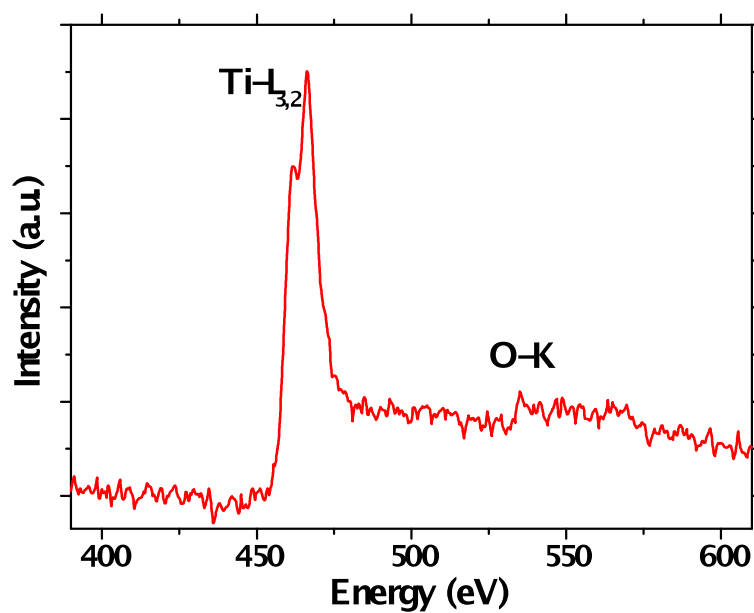

**Figure S6:** EELS spectrum obtained from the spectrum image presented in figure 5 (c).
